# Supplementary material for: Storylines of extreme summer temperatures in southern South America
Source: Copernicus journal article supplement (doi:10.5194/wcd-7-149-2026), 2026-01-21
Supplement: Supplementary file 1 [file wcd-7-149-2026-supplement.pdf]

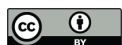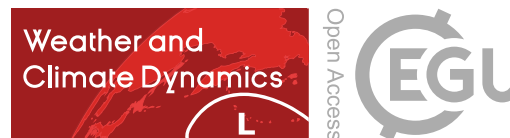

*Supplement of*

## **Storylines of extreme summer temperatures in southern South America**

**Solange Suli et al.**

*Correspondence to:* Solange Suli (ssuli@ucm.es)

The copyright of individual parts of the supplement might differ from the article licence.

| <b>Model name</b> | <b>Modelling centre</b>                                                                                                                                                   | <b>Member</b> | <b>Resolution<br/>(lon x lat)</b> |
|-------------------|---------------------------------------------------------------------------------------------------------------------------------------------------------------------------|---------------|-----------------------------------|
| ACCESS-CM2        | Australian Community Climate and Earth<br>System Simulator (ACCESS), Australia                                                                                            | r1i1p1f1      | 1.9° x 1.3°                       |
| ACCESS-ESM1-5     | Australian Community Climate and Earth<br>System Simulator (ACCESS), Australia                                                                                            | r1i1p1f1      | 1.9° x 1.3°                       |
| BCC-CSM2-MR       | Beijing Climate Center, Beijing, China                                                                                                                                    | r1i1p1f1      | 1.1° x 1.1°                       |
| CAMS-CSM1-0       | Chinese Academy of Meteorological Sciences,<br>Beijing, China                                                                                                             | r2i1p1f1      | 1.1° x 1.1°                       |
| CMCC-ESM2         | Fondazione Centro Euro-Mediterraneo sui<br>Cambiamenti Climatici, Italy                                                                                                   | r1i1p1f1      | 1.3° x 0.9°                       |
| CNRM-CM6-1        | Centre National de Recherches<br>Météorologiques, France                                                                                                                  | r1i1p1f2      | 1.4° x 1.4°                       |
| CNRM-CM6-1-HR     | Centre National de Recherches<br>Météorologiques, France                                                                                                                  | r1i1p1f2      | 0.5° x 0.5°                       |
| CNRM-ESM2-1       | Centre National de Recherches<br>Météorologiques, France                                                                                                                  | r1i1p1f2      | 1.4° x 1.4°                       |
| EC-Earth3         | Consortium of various institutions from Spain,<br>Italy, Denmark, Finland, Germany, Ireland,<br>Portugal, Netherlands, Norway, the United<br>Kingdom, Belgium, and Sweden | r1i1p1f1      | 0.7° x 0.7°                       |
| EC-Earth3-CC      | Consortium of various institutions from Spain,<br>Italy, Denmark, Finland, Germany, Ireland,<br>Portugal, Netherlands, Norway, the United<br>Kingdom, Belgium, and Sweden | r1i1p1f1      | 0.7° x 0.7°                       |
| EC-Earth3-Veg     | Consortium of various institutions from Spain,<br>Italy, Denmark, Finland, Germany, Ireland,<br>Portugal, Netherlands, Norway, the United<br>Kingdom, Belgium, and Sweden | r1i1p1f1      | 0.7° x 0.7°                       |
| EC-Earth3-Veg-LR  | Consortium of various institutions from Spain,<br>Italy, Denmark, Finland, Germany, Ireland,<br>Portugal, Netherlands, Norway, the United<br>Kingdom, Belgium, and Sweden | r1i1p1f1      | 1.1° x 1.1°                       |
| GFDL-CM4          | National Oceanic and Atmospheric<br>Administration, GFDL, Princeton, USA                                                                                                  | r1i1p1f1      | 1.3° x 1.0°                       |

|                 |                                                                                                           |          |             |
|-----------------|-----------------------------------------------------------------------------------------------------------|----------|-------------|
| GFDL-ESM4       | National Oceanic and Atmospheric Administration, GFDL, Princeton, USA                                     | rlilp1f1 | 1.3° x 1.0° |
| GISS-E2-1-G     | Goddard Institute for Space Studies, United States                                                        | rlilp1f2 | 2.5° x 2°   |
| HADGEM3-GC31-LL | Met Office Hadley Centre (UKMO), United Kingdom                                                           | rlilp1f3 | 1.9° x 1.3° |
| HADGEM3-GC31-MM | Met Office Hadley Centre (UKMO), United Kingdom                                                           | rlilp1f3 | 0.8 x 0.6   |
| INM-CM4-8       | Institute for Numerical Mathematics, Russian Academy of Science, Moscow, Russia                           | rlilp1f1 | 2.0° x 1.5° |
| INM-CM5-0       | Institute for Numerical Mathematics, Russian Academy of Science, Moscow, Russia                           | rlilp1f1 | 2.0° x 1.5° |
| IPSL-CM6A-LR    | Institut Pierre Simon Laplace, Paris, France                                                              | rlilp1f1 | 2.5° x 1.3° |
| KACE-1-0-G      | National Institute of Meteorological Sciences/Korea Meteorological Administration (NIMS-KMA), South Korea | rlilp1f1 | 1.9° x 1.3° |
| MPI-ESM1-2-HR   | Max Planck Institute for Meteorology, Germany                                                             | rlilp1f1 | 0.9° x 0.9° |
| MPI-ESM1-2-LR   | Max Planck Institute for Meteorology, Germany                                                             | rlilp1f1 | 1.9° x 1.9° |
| MRI-ESM2-0      | Meteorological Research Institute, Tsukuba, Japan                                                         | rlilp1f1 | 1.1° x 1.1° |
| TAIESM1         | Research Center for Environmental Changes, Academia Sinica, Taiwan                                        | rlilp1f1 | 1.3° x 0.9° |
| UKESM1-0-LL     | Met Office Hadley Centre (UKMO), Devon, United Kingdom                                                    | rlilp1f2 | 1.9° x 1.3° |

**Table S1. List of CMIP6 models used in the study.**

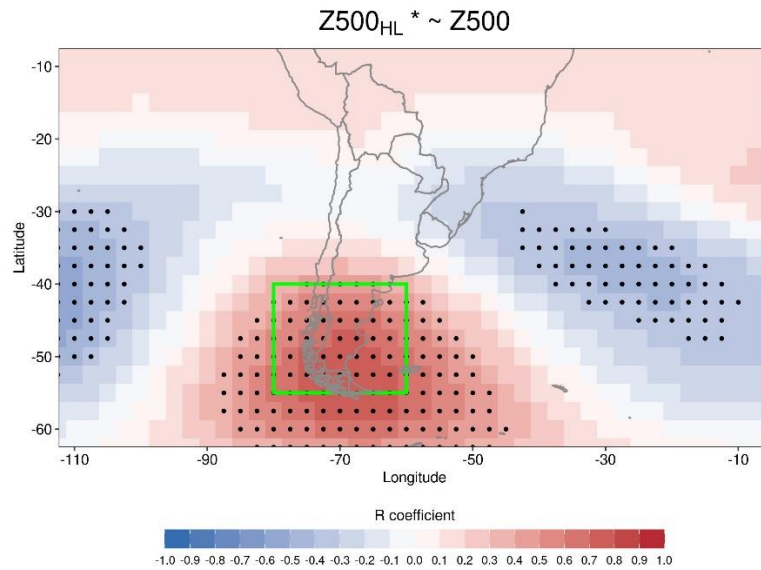

**Figure S1. MMM Pearson correlation coefficients of the summer (DJF) series of the  $Z500_{HL}^*$  driver and  $Z500$  during the historical period (1979–2014). The box indicates the region used to construct the driver and stippling areas denote regions where at least 66% of the models show significant correlations ( $p < 0.1$ ) of the same sign.**

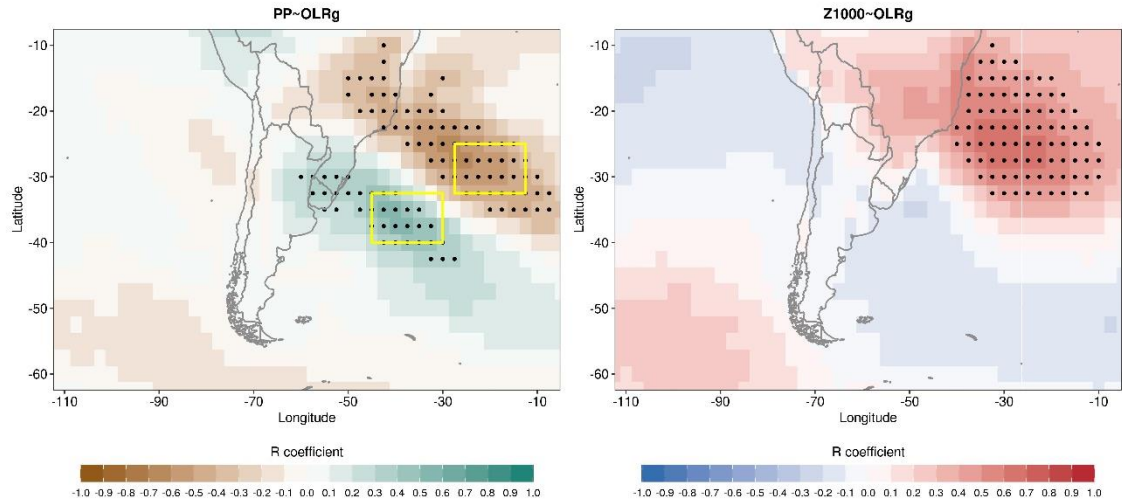

**Figure S2.** MMM Pearson correlation coefficients of the summer (DJF) series of the OLRg driver and 2D fields of: left) precipitation; right) Z1000 during the historical period (1979–2014). Boxes indicate the regions used to construct the OLR gradient and stippling areas denote regions where at least 66% of the models show significant correlations ( $p < 0.1$ ) of the same sign.

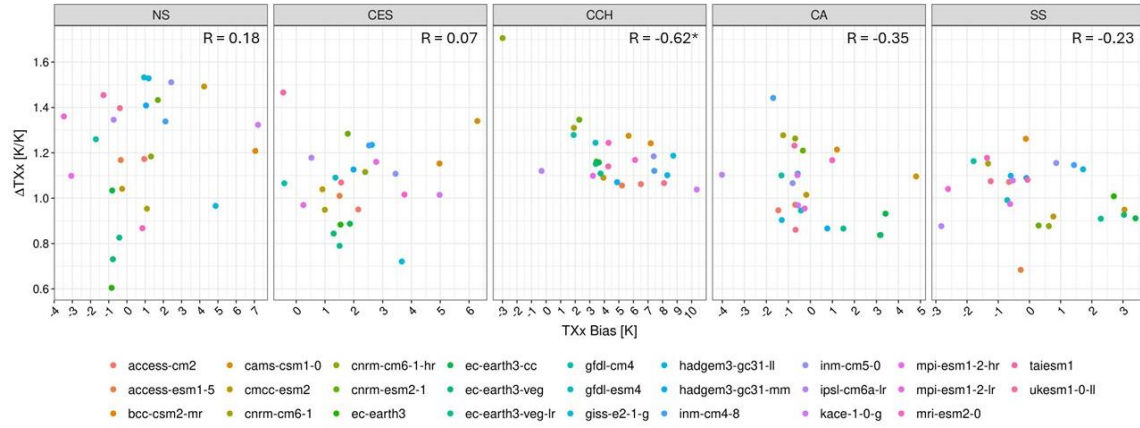

**Figure S3.** Summer TXx changes ( $\Delta TXx$ ) scaled by global warming (K/K) against TXx biases [K] for each GCM (colour circles) and SSA region (panels). The Pearson correlation coefficient is shown in the upper right corner, with an asterisk denoting statistically significant correlations at the 95% confidence level.

| Driver               | Internal variability | Inter-model spread | Inter-model spread /<br>Internal variability |
|----------------------|----------------------|--------------------|----------------------------------------------|
| N3.4                 | 0.07                 | 0.45               | 6.42*                                        |
| OLRg                 | 3.13                 | 13.55              | 4.32*                                        |
| Z500 <sub>HL</sub> * | 27.98                | 51.71              | 1.85*                                        |
| SM <sub>SS</sub>     | 0.06                 | 0.78               | 13.00*                                       |
| SM <sub>CA</sub>     | 0.09                 | 0.54               | 6.00*                                        |
| SM <sub>north</sub>  | 0.18                 | 2.20               | 12.22*                                       |

**Table S2.** Internal variability (MMM standard deviation of the detrended series) and inter-model spread (standard deviation of the projected changes) for the selected drivers of each SSA region. All values are scaled by global warming. The last column represents the ratio of uncertainty to internal variability, with asterisks indicating significant differences at  $p < 0.1$  after an F-test.

| Region | $\Delta TX_x$                           | $\Delta TX_{90}$        | $\Delta D$              | $\Delta E$                     | $\Delta I$       |
|--------|-----------------------------------------|-------------------------|-------------------------|--------------------------------|------------------|
| NS     | $\Delta N_{3.4}, \Delta OLR_g$          | -                       | -                       | -                              | -                |
| CES    | $\Delta OLR_g$                          | -                       | -                       | $\Delta OLR_g$                 | -                |
| CA     | $\Delta SM_{CA}, \Delta OLR_g$          | $\Delta SM_{CA}$        | $\Delta SM_{CA}$        | $\Delta SM_{CA}, \Delta OLR_g$ | -                |
| SS     | $\Delta SM_{SS}, \Delta Z_{500_{HL}}^*$ | $\Delta Z_{500_{HL}}^*$ | $\Delta Z_{500_{HL}}^*$ | $\Delta OLR_g$                 | $\Delta SM_{SS}$ |

**Table S3.** Statistically significant drivers (p-value < 0.1) for each heatwave index (columns:  $\Delta TX_x$ ,  $\Delta TX_{90}$ , and changes in duration, extension and intensity) and SSA region (rows: NS, CES, CA and SS). Heatwave attributes were extracted from the algorithm developed by Sánchez-Benítez et al. (2020). The dash ('-') indicates that none of the drivers showed a statistically significant relationship with the corresponding index.
